# Supplementary material
Source: PubMed Central journal article supplement (PMC5310766)
Supplement: NIHMS848273-supplement-Supplement1.pdf [file NIHMS848273-supplement-Supplement1.pdf]

## Supplementary Appendix

This appendix has been provided by the authors to give readers additional information about their work.

Supplement to: Moler FW, Silverstein FS, Holubkov R, et al. Therapeutic hypothermia after in-hospital cardiac arrest in children. *N Engl J Med* 2017;376:318-29. DOI: [10.1056/NEJMoa1610493](https://doi.org/10.1056/NEJMoa1610493)

## SUPPLEMENTARY APPENDIX

| <b>PERSONNEL, SITES, FUNDING ACKNOWLEDGEMENTS</b>                                                                    | <b>Page number</b> |
|----------------------------------------------------------------------------------------------------------------------|--------------------|
| Principal Investigator (Scientific-PI)                                                                               | 3                  |
| Data Coordinating Center (DCC)                                                                                       | 3                  |
| DCC-PI                                                                                                               | 3                  |
| Lead Biostatistician                                                                                                 | 3                  |
| Outcome Center                                                                                                       | 3                  |
| Executive Committee                                                                                                  | 3                  |
| Sites and Research teams:                                                                                            | 4-11               |
| Research Networks                                                                                                    | 11-12              |
| DSMB                                                                                                                 | 12                 |
| NHLBI                                                                                                                | 12                 |
| Funding                                                                                                              | 13                 |
| <b>SUPPLEMENTARY METHODS</b>                                                                                         | <b>14</b>          |
| Inclusion and Exclusion Criteria                                                                                     | 14-15              |
| Site Training                                                                                                        | 16                 |
| Outcome training                                                                                                     | 16-18              |
| Data Management and Site Monitoring                                                                                  | 18                 |
| <b>SUPPLEMENTARY RESULTS</b>                                                                                         | <b>19</b>          |
| Temperature Intervention                                                                                             | 19                 |
| Modified Intention-to-treat                                                                                          | 19                 |
| Sensitivity Analysis                                                                                                 | 20                 |
| <b>SUPPLEMENTARY FIGURES AND TABLES</b>                                                                              | <b>21</b>          |
| Figure S1. Temperature of Patients during 120 Hours of Targeted Temperature Management, According to Treatment Group | 22                 |
| Table S1. Medical History and Primary Cause of the Cardiac Arrest                                                    | 23                 |
| Table S2. Location within Hospital at Time of Cardiac Arrest                                                         | 24                 |
| Table S3. Clinical Characteristics Prior to Intervention for Study Population                                        | 25                 |
| Table S4. Baseline PCPC, POPC and VABS-II for THAPCA-IH eligible population                                          | 26                 |
| Table S5. Cause of death                                                                                             | 27                 |
| Table S6. 12 month functioning Mullen and WASI                                                                       | 28-29              |
| Table S7. Other adverse events                                                                                       | 30                 |
| Table S8. Summary of Serious Adverse Events by MedDRA System Organ Class by Treatment Received                       | 31                 |
| Table S9. Subgroups (age, gender, ethnicity, race)                                                                   | 32                 |
| Table S10. Subgroups (Rhythm, CPR duration, arrest etiology)                                                         | 33                 |
| Table S11. Blood Product Use Excluding ECMO Patients                                                                 | 34                 |

## **PERSONNEL, SITES, FUNDING AND ACKNOWLEDGEMENTS**

**Lead Site - University of Michigan, Ann Arbor, Michigan**

**Principal Investigator (PI) (Scientific) - Frank W. Moler, MD, MS**

**Data Coordinating Center (DCC), University of Utah, Salt Lake City, Utah.**

**Principal Investigator DCC - J. Michael Dean, MD, MBA**

**Lead Biostatistician - Richard Holubkov, PhD**

**Outcome Center, Kennedy Krieger Institute, Baltimore, Maryland. Academic affiliation with Johns Hopkins University, School of Medicine**

James R. Christensen, MD, Beth S. Slomine, PhD

### **Executive Committee**

|                        |                         |                            |
|------------------------|-------------------------|----------------------------|
| F. Moler, MD, MS,      | PI (Scientific)         | University of Michigan     |
| J. M. Dean, MD, MBA    | PI (DCC)                | University of Utah         |
| R. Holubkov, PhD       | Biostatistician         | University of Utah         |
| K. Meert, MD           | Critical Care           | Wayne State University     |
| J. Hutchison, MD       | Critical Care           | University of Toronto      |
| V. Nadkarni, MD        | Critical Care           | University of Pennsylvania |
| N. Kuppermann, MD, MPH | Emergency Medicine      | UC-Davis                   |
| S. Shankaran, MD       | Neonatology             | Wayne State University     |
| F. Silverstein, MD     | Neurology               | University of Michigan     |
| J. Christensen, MD     | Rehabilitation Medicine | Kennedy Krieger Institute  |
| V. Pemberton, RNC, MS  | NHLBI                   | NIH                        |
| C. Nicholson, MD, MS   | NICHD, CPCCRN           | NIH                        |
| T. Singh Weik, DrPH    | MCHB EMSC, PECARN       | HRSA                       |

## **Sites and research teams - contributors**

**We acknowledge the contributions of the following sites and individuals who made the THAPCA-IH Trial possible.**

Site principal investigators (PI), Sub-investigators (Sub-I), Clinical research coordinators (CRC), and Research Assistant (RA).

### **The Children's Hospital of Alabama, Birmingham, AL**

J. Alten (PI), S. Borasino (Sub-I), K. Hock (CRC), K. Sewell (CRC), L. Dure (Neurologist), D. Marullo (Psychologist)

### **Arkansas Children's Hospital, Arkansas Children's Research Institute and the University of Arkansas for Medical Sciences, Little Rock, AR**

R. Sanders Jr. (PI), P. Proadhan (Sub-I), G. Hefley (CRC)

### **Phoenix Children's Hospital, Phoenix, AZ**

H. J. Dalton (PI), S. Buttram (PI), K. Wai (Sub-I), A. La Bell (CRC), C. Bliss (CRC), D. Liss (CRC), A. Ortiz (CRC), C. Downhour (CRC), K. Williams (Neurologist), M. Lavoie (Psychologist), V. Bordes-Edgar (Psychologist)

### **Diamond Children's Medical Center, Tucson, AZ**

A. Theodorou (PI), K. Typpo (Sub-I), C. Wells (CRC), J. Deschenes (CRC)

### **Children's Hospital Los Angeles, Los Angeles, CA**

C. Newth (PI), S. Rubin (Sub-I), R. Bart (Sub-I), T. Deakers (Sub-I), A. Bhalla (Sub-I), R. Khemani (Sub-I), B. Markovitz (Sub-I), J. DiCarlo (Sub-I), P. Ross (Sub-I), C. Herrington (Sub-I), W. Wells (Sub-I), R. Kim (Sub-I), L. Nelson (Sub-I), M. Villa (CRC), F. Fajardo (CRC), J. Kwok (CRC), J. Serrano (CRC), J. Valentine (CRC), J. Terry (CRC), A. Yamakawa (CRC), S. Briones (CRC), S. Cauley (RN), A. Briseno (RN), C. Young (RN), L. Topper (RN), M. Nyc (CRC), T. Rosser (Neurologist), J. Gold (Psychologist), R. Engilman (Psychometrician)

### **Children's Hospital of Orange County, Orange, CA**

A. Schwarz (PI), J. Haykawa (Sub-I), O. Vargas-Shiraishi (CRC), A. Galion (Neurologist)

**Loma Linda University Children's Hospital, Loma Linda, CA**

M. Mathur (PI), G. Oei (Sub-I), J. Newcombe (CRC), A. Pinto (CRC), S. Ashwal (Neurologist), D. Michelson (Neurologist), J. Pivonka-Jones (Neuropsychologist)

**Mattel Children's Hospital UCLA, Los Angeles, CA**

R. Harrison (PI), R. Kelly (Sub-I), A. Madikians (Sub-I), M. Federman (Sub-I), A. Yamakawa (CRC), M. Nyc (CRC), S. Briones (CRC), M. Villa (CRC), J. Kwok (CRC), J. Serrano (CRC), J. Valentine (CRC)

**University of California, San Francisco Benioff Children's Hospital, San Francisco, CA**

P. McQuillen (PI), S. Tabbutt (Sub-I), L. Haeusslein (CRC), S. Strong (CRC), H. Glass (Neurologist), B. Johnson (Psychologist), B. Loomis (Psychologist), D. Gano (Neurologist)

**Hospital for Sick Children, Toronto, ON, Canada**

J. Hutchison (PI), S. Schwartz (Sub-I), A. Guerguerian (Sub-I), K. Boutis (Sub-I), D. Clark (CRC), J. Van Huyse (CRC), K. Fusco (CRC), K. McBain (CRC), A. Krancevic (CRC), L. Toller (CRC), R. Gaiteiro (CRC), S. Furness (CRC), R. Askalan (Neurologist), C. Hahn (Neurologist), R. Sananes (Psychologist)

**Children's Hospital Colorado, Aurora, CO**

E. Dobyans (PI), J. Albietz (Sub-I), L. Rappaport (Sub-I), E. Jewett (CRC), T. Wilson (CRC), B. Wathen (CRC), M. Dix (CRC), J. Allen (CRC), T. Garling (CRC), D. DiDomenico (CRC), D. Loyola (CRC), T. Bernard (Neurologist), J. Dise-Lewis (Psychologist)

**All Children's Hospital, Tampa, FL**

A. Stock (PI), K. Battick (CRC), A. Fleming (CRC), J. Hanson (CRC), M. Macogay (CRC), K. Martin (CRC), K. Burger (CRC)

**Children's Healthcare of Atlanta, Atlanta, GA**

N. Pham (PI), N. Chanani (Sub-I), K. Walson (Sub-I), J. Sturm (Sub-I), W. Mahle (Sub-I), M. Wolf (Sub-I), C. Stone (CRC), A. Wellons (CRC), S. Meisner (CRC), E. Hoar (CRC), K. Fields (CRC), S. Gentry (CRC), L. Smitley (CRC), L. McMaster (CRC), R. Willis (CRC), P. Holt (Neurologist), B. Weissman (Neurologist), A. Alexander (Psychologist), A. Johnson (Psychologist)

**Riley Hospital for Children, Indianapolis, IN**

M. Rigby (PI), R. Lutfi (PI), C. Rider (CRC), J. Liford (CRC), G. Thomas (CRC), D. Sokol (neurologist), B. McDonald (psychologist)

**Ann & Robert Lurie Children's Hospital of Chicago, Chicago, IL**

D. Goodman (PI), C. Smith (PI), E. Powell (Sub-I), S. Shah (CRC), J. Chiambrietti (CRC), C. Lutz (CRC), C. Vitt (CRC), L. Jackson-McCarthy (CRC), N. Leannais (CRC), M. Wainwright (Neurologist), J. Goldstein (Neurologist), C. Weil (Psychologist)

**Kosair Charities Pediatric Clinical Research Unit, Department of Pediatrics, University of Louisville and the Kosair Children's Hospital, Louisville, KY**

M. Porter (PI), J. Sullivan (Sub-I), K. Orman (Sub-I), E. Owen (Sub-I), K. Potter (Sub-I), E. Peterson (Sub-I), M. Ruppe (Sub – I), J. Berkenbosch (Sub-I), M. McDonald (Sub-I), V. Montgomery (Sub-I), A. Calhoun (Sub-I), M. Thomas (CRC), A. Michael (CRC), J. Nason (CRC), K. Kernan (CRC), L. Good (CRC), V. Puri (Neurologist), L. Sears (Psychologist)

**Johns Hopkins Children's Center, Baltimore, MD**

U. Bhalala (PI), J.K. Lee (PI), M. Bembea (PI), D. Shaffner (Sub-I), A. Walker (Sub-I), B. Shivakumar (CRC) M. Shackelford (CRC), A. Larson (CRC), J. Jamrogowicz (CRC), J. Kim (CRC), R. Felling (Neurologist), B. Slomine (Psychologist)

**Outcome Center, Kennedy Krieger Institute, Baltimore, MD**

J.R. Christensen (Site PI), B.S. Slomine (Site Co-Investigator), E. DeMatt (Telephone Interviewer), M. Talley (Telephone Interviewer), C. Rodweller (Telephone Interviewer)

**Children's Hospital of Michigan, Detroit, MI**

K. Meert (PI), S. Heidemann (Sub-I), J. Clark (Sub-I), R. Delius (Sub-I), H.L. Walters III (Sub-I), A. Pawluszka (CRC), M. Lulic (RA), L. Sivaswamy (Neurologist), S. Horman (Psychometrician), L. Chiodo (Psychologist)

**C.S. Mott Children's Hospital, University of Michigan, Ann Arbor, MIF.**

Moler (PI), M. Gaies (Sub-I), M. Weber (CRC), J. Reske (CRC), L. Conlin (CRC), N. Harris (CRC), F. Silverstein (Neurologist), M. Carlson (Neurologist), S. Warschausky (Psychologist), T. Behnke (Program Administrator), D. Poszywak (Procurement Subcontract Administrator).

*“Research reported in this publication was supported by the National Center for Advancing Translational Sciences of the National Institutes of Health under Award Numbers UL1 RR 024986 and UL1 TR 000433. The content is solely the responsibility of the authors and does not necessarily represent the official views of the National Institutes of Health.”*

**Children’s Hospitals and Clinics of Minnesota, Minneapolis, MN**

J. Nowak (PI), E. Zielinski (CRC), A. Doucette (CRC), A. Overman (CRC), C. Leonard (CRC), E. Gilles (Neurologist), P. Huszar (Neurologist), M. Troy (Psychologist), J. Alden (Psychologist)

**Washington University, St. Louis, MO**

J. Pineda (PI), P. Oren (Sub-I), M. Shoykhet (Sub-I), S. Friess (Sub-I), K. Guilliams (Sub-I), A. Gazit (Sub-I), A. Doctor (Sub-I), T. Day (CRC), T. Hicks (CRC), L. Bargarier (CRC), E. Fish (CRC), L. Toennies (CRC), P. Thurst (CRC), S. Blankenship (CRC), M. Noetzel (Neurologist), K. Guilliams (Neurologist), D. White (Psychologist). *Research reported in this publication was supported by the Eunice Kennedy Shriver National Institute Of Child Health & Human Development of the National Institutes of Health under Award Number U54 HD087011 to the Intellectual and Developmental Disabilities Research Center at Washington University. The content is solely the responsibility of the authors and does not necessarily represent the official views of the National Institutes of Health.*

**Morgan Stanley Children’s Hospital/Columbia University Medical Center New York, NY**

C. Schleien (PI), N. Talathoti (CRC), N. Sidhu (Neurologist), V. Hinton (Psychologist)

**Golisano Children’s Hospital, University of Rochester Medical Center, Rochester, NY**

E. W. van der Jagt, (PI), E. B. Nazarian (Sub-I), L. E. Daugherty (Sub-I), E. R. Taillie (CRC), J. L. Mulbury (Neurologist), H. R. Adams (Neuropsychologist)

**Duke Children’s Hospital, Durham, NC**

G. Ofori-Amanfo (PI), K. Rehder (PI), S. Wrenn (CRC), T. Uhl (CRC), C. Milleson (CRC), E. Smith (Neurologist), K. Gustafson (Psychologist), S. Asbeck (Psychologist), W. Gallentine (Neurologist)

**Nationwide Children’s Hospital, Columbus, OH**

E. Lloyd (PI), M. Hall (Sub-I), N. Khan (Sub-I), J. Frazier (Sub-I), Daniel Cohen (Sub-I), J.

Haines (CRC), K. Carter (CRC), L. Bird (CRC), W. Lo (Neurologist), K. Yeates (Psychologist), K. Morfing (Psychologist), M. Ginn (Psychologist)

**Cincinnati Children's Hospital, Cincinnati, OH**

D. Wheeler (PI), E. Beckman (CRC), S. Banschbach (CRC), M. Monaco (CRC), K. Howard (CRC)

**Rainbow Babies and Children's Hospital, Cleveland, OH**

K. Lidsky (PI), S. Bergant (CRC), A. Browning (CRC), J. Haky (CRC)

**Penn State Children's Hospital, Hershey, PA**

N. Thomas (PI), A. Shelly (CRC), J. Vallati (CRC), P. Carper (CRC), D. Spear (CRC), A. McMonagle (CRC), J. Stokes (CRC), H. Watts (CRC), W. Trescher (Neurologist), C. Flaherty-Craig (Psychologist)

**Children's Hospital of Philadelphia, Philadelphia, PA**

A. Topjian (PI), R. Berg (Sub-I), V. Nadkarni (Sub-I), A. Zuppa (Sub-I), S. Friess (Sub-I), J. Fitzgerald (Sub-I), P. Meaney (Sub-I), E. Alpern (EM Sub-I), M. DiLiberto (CRC), C. Twelves (CRC), S. McGowan (CRC), M. Sisko (CRC), B. Park (CRC), R. Ichord (Neurologist), J. Radcliffe (Psychologist), N. Hattiangadi Thomas (Psychologist), K. Friedman (Psychologist), A. Sullivan (Psychometrist). *The project described was supported by the National Center for Research Resources and the National Center for Advancing Translational Sciences, National Institutes of Health, through Grant UL1TR000003. The content is solely the responsibility of the authors and does not necessarily represent the official views of the NIH.*

**University of Pittsburgh Medical Center, Pittsburgh, PA**

E. Fink (PI), R. Clark (Planning Committee), M. Bell (Sub-I), R. Munoz (Sub-I), A. Abraham (CRC), R. Bell (CRC), D. Cummings (Neurologist) S. Beers (Psychologist), H. Feldman (Psychologist)

**University of Tennessee Health Science Center, Memphis, TN**

S. Shah (PI), K. Anand (Sub-I), C. Woodward (Sub-I), A. Hickerson (CRC), B. Moore (CRC), A. Nico West (CRC), M. Grandberry (CRC), N. Shah (Neurologist), N. Clanton (Psychologist), L.



Berkelhammer (Psychologist), O. King (Psychologist), A. Huling (Psychologist), L. White (Psychologist)

**Children's Medical Center Dallas, University of Texas Southwestern Medical School, Dallas, TX**

J. Koch (PI), P. Okada (Sub-I), D. Miles (Sub-I), L. Raman (Sub-I), M. Green (Sub-I), E. Golson (CRC), A. Jones (CRC), D. Kelly (CRC), T. Plumb (CRC), K. Van de Bruinhorst (CRC), M. Dowling (Neurologist), P. Stavinoha (Psychologist), A. Hernandez (Psychometrician)

**University of Texas Health Sciences Center at San Antonio, San Antonio, TX**

T. Wu (PI), C. Bauerfeld (Sub-I), H. Dibrell (CRC), S. Atkinson (Neurologist), L. O'Donnell (Psychologist), J. Eubanks (Psychologist)

**Texas Children's Hospital, Houston, TX**

L. Shekerdemian (PI), M. Goldsworthy, (CRC)

**Data Coordinating Center (DCC), University of Utah, Salt Lake City, UT**

J. M. Dean (PI), R. Holubkov (Biostatistician), B. Browning (Program Director), M. Gildea (Program Director), R. Kuhn (Project Manager), K. Register (Project Manager), N. Tattersall (Project Manager), A. Vrem (Project Manager), K. Jacobsen (Project Manager), A. Webster (Biostatistician), A. Clark (Biostatistician), K. Page (Biostatistician), J. Wang (Biostatistician), R. Telford (Biostatistician), L. Herrera (Data Manager), J. Yearley (Director Data Management), R. Enriquez (Director Information Technology/Information Systems), D. Demarco (Data Center Manager), M. Virtosu (Senior Software Engineer), S. Su (Senior Software Engineer), J. Bell (Senior Database Developer), S. Zuspan (PECARN Program Director), J. Burr (CPCCRN Program Director), S. Simmons (Information Coordinator), V. McKean (Administrative Assistant), C. Traeden (Administrative Assistant), H. Nitsuma (Administrative Assistant), B. Marron (Administrative Assistant)

**Primary Children's Hospital, Salt Lake City, UT**

K.S. Bennett (PI), J. Sweney (PI), J. Lilley (CRC), S. Bjerregaard (CRC), K. Jacobsen (CRC), A. Watson, (CRC), D. Stephen (CRC), M. Delacruz (CRC), K. Cooley (CRC), N. Kwendakwema (CRC), B. Ameel (CRC), G. Jensen (CRC), M. Metcalf (CRC), R. Cole (CRC), R. Moore (CRC), M. Sweney (Neurologist), D. Morita (Neurologist), R. Burr (Psychologist), T. Bennett (Sub-I), J.

Henricksen (Sub-I), E. Hirshberg (Sub-I), A. Hubbard (Sub-I), G. Larsen (Sub-I), B. Poss (Sub-I), M. Schober (Sub-I), R. Dixon (Sub-I), J. Workman (Sub-I), J. Woods (Sub-I)

### **Seattle Children's Hospital, Seattle, WA**

J. Zimmerman (PI), J. McGuire (Sub-I), R. Farris (Sub-I), O. Yanay (Sub-I), L. Smith (Sub-I), T. Brogan (Sub-I), S. Hamilton (CRC), R. Barker (CRC), C. Greeley (CRC), C. Cheng (CRC), M. Sadler Greever (CRC), E. Sullivan (CRC), S. Gospe (Neurologist), C. Amlie-Lefond (Neurologist), D. Breiger (Psychologist), A. Paolozzi (Psychologist)

### **Children's National Medical Center, Washington, DC**

J. Berger (PI), D. Wessel (Sub-I), M. Sharron (Sub-I), S. Basu (Sub-I), A. Wratney (Sub-I), N. Dean (Sub-I), J. Reardon (CRC), E. Tomanio (CRC), F. Ramos (RA), B. Tadesse (RA), M. Menicucci (CRC), J. Carpenter (Neurologist), S. Swanson (Psychologist), T. Brennan (Psychologist), P. Glass (Psychologist), B. Malek (Psychologist), M. Mintz (Psychologist). *Our follow ups were conducted in the Clinical Research Center which is supported by NIH P30HD040677.*

### **Medical College of Wisconsin, Milwaukee, WI**

M. T. Meyer (PI), M. Wakeham (Sub-I), S. Hanson (Sub-I), Marc Gorelick (Sub-I), M. Christensen (CRC), D. Triscari (CRC), B. Horn (CRC), K. Murkowski (CRC), K. Hecox (Neurologist), C. Brosig (Psychologist)

### **UK Sites**

#### **Alder Hey Children's Hospital, Liverpool, United Kingdom**

P. Baines (PI), N. Shetty (Sub-I), A. Wood (CRC), E. Scott (CRC), S. Siner (CRC), L. Walsh (CRC)

#### **Birmingham Children's Hospital, Birmingham, United Kingdom**

B. Scholefield (Lead UK Study PI), A. Jones (Lead UK Study CRC), T. Cameron (CRC), A. Mohammed Ali (Sub-I), K. Morris (Sub-I), I. Zafurallah (Sub-I), D. Ellis (Sub-I), A. Top (Sub-I), C. McTernan (CRC), J. Menzies (CRC)

#### **Bristol Royal Hospital for Children, Bristol, United Kingdom**

M. Schindler (PI), S. George (CRC), S. Potter (CRC), H. Smee (CRC)

**Great Ormond Street Hospital, London, United Kingdom**

S. Skellett (PI), T. Thiruchelvam (PI), A.J. Petros (Sub-I), M.J. Peters (Sub-I) P. Payne (CRC),  
D. Goodacre (CRC), A. Jones (CRC)

**Evelina London Children's Hospital, London, United Kingdom**

A. Nyman (PI), J. Harris (CRC), P. Wellman (CRC), H. Belfield (CRC)

**Royal Manchester Children's Hospital, Manchester, United Kingdom**

S. Playfor (PI), P. Hudnott (CRC), C. O'Riordan (CRC)

**University Hospital Southampton, Southampton, United Kingdom**

J. Pappachan (PI), R. Fowler (CRC), R. Ensom (CRC), K. Morton (CRC)

**Clinical Research Networks**

**Pediatric Emergency Care Applied Research Network (PECARN)**

*PECARN Steering Committee:* P. Dayan, Chair; E. Alpern, L. Bajaj, K. Brown, D. Borgiali, J. Chamberlain, J. M. Dean, M. Gorelick, D. Jaffe, N. Kupperman, M. Kwok, R. Lichenstein, K. Lillis, P. Mahajan, R. Maio, D. Monroe, L. Nigrovic, E. Powell, A. Rogers, R. Ruddy, R. Stanley, M. Tunik

*MCHB/EMSC liaisons:* D. Kavanaugh, H. Park.

*Central Data Management and Coordinating Center (CDMCC):* J. M. Dean, H. Gramse, R. Holubkov, A.Clark, R. Enriquez, C. Olson, S. Zuspan

*Feasibility and Budget Subcommittee (FABS):* K. Brown, S. Goldfarb, Co-Chairs; E. Crain, E. Kim, S. Krug, D. Monroe, D. Nelson, M. Berlyant, S. Zuspan

*Grants and Publications Subcommittee (GAPS):* M. Gorelick, Chair; L. Alpern, J. Anders, D. Borgiali, L. Babcock Cimpello, A.Clark, G. Foltin, F. Moler, K. Shreve

*Protocol Review and Development Subcommittee (PCRADS):* D. Jaffe, Chair; J. Chamberlain, P. Dayan, J.M. Dean, R. Holubkov, L. Nigrovic, E. Powell, K. Shaw, R. Stanley, M. Tunik

*Quality Assurance Subcommittee (QAS):* K. Lillis, Chair; E. Alessandrini, S. Blumberg, R. Enriquez, R. Lichenstein, P. Mahajan, R. McDuffie, R. Ruddy, B. Thomas, J. Wade

*Safety and Regulatory Affairs Subcommittee (SRAS):* W. Schalick, J. Hoyle, Co-Chairs; S. Atabaki, K. Call, H. Gramse, M. Kwok, A. Rogers, D. Schnadower, N. Kuppermann

**Collaborative Pediatric Critical Care Research Network (CPCCRN)**

C.J. Newth, R. Harrison, K. Meert, S. Heidemann, T. Shanley, F. Moler, A. Zuppa, R. Berg, J. Berger, D. Wessel, H. Dalton, M. Pollack, M. Bell, J. Carcillo, A. Clark, R. Holubkov, J.M. Dean, and C. Nicholson for the *Eunice Kennedy Shriver* National Institute of Child Health and Human Development (NICHD) Collaborative Pediatric Critical Care Research Network (CPCCRN).

**DSMB**

- A. Zaritsky, MD (DSMB Chair), (Pediatrics), Eastern Virginia Medical School, Norfolk, VA
- A. Atz, MD, (Pediatric Cardiology and Intensive Care), Medical University of South Carolina, Charleston, SC
- D.V. Glidden, PhD, (Biostatistics), University of California San Francisco, San Francisco, CA
- J. Lantos, MD, (Bioethics), Children's Mercy Kansas City,, Kansas City, MO
- M. Gausche-Hill, MD, (Pediatric Emergency Medicine/EMS), Harbor-UCLA Medical Center, Torrance, CA
- G. L. Holmes, MD, (Neurology), University of Vermont, College of Medicine, Burlington, VT
- R. Ehrenkranz, MD, (Neonatal-Perinatal Medicine), Yale University School of Medicine, New Haven, CT

**National Heart, Lung, and Blood Institute, Bethesda, MD**

V. Pemberton, J. Kaltman, J. Troendle, G. Pearson

## Funding

Primary support for the conduct of the THAPCA-IH Trial was funding from the National Institutes of Health (NIH), National Heart, Lung, and Blood Institute, Bethesda, MD. HL094345 (FWM) and HL094339 (JMD).

Additional support from the following federal planning grants contributed to the planning of the THAPCA Trials: NIH, *Eunice Kennedy Shriver* National Institute of Child Health and Development (NICHD), Bethesda, MD. HD044955 (FWM) and HD050531 (FWM).

In part support was from the participation of the following research networks: Pediatric Emergency Care Applied Research Network (PECARN) from cooperative agreements U03MC00001, U03MC00003, U03MC00006, U03MC00007, and U03MC00008; and the Collaborative Pediatric Critical Care Research Network (CPCCRN) from cooperative agreements (U10HD500009, U10HD050096, U10HD049981, U10HD049945, U10HD049983, U10HD050012 and U01HD049934).

At several centers (indicated above), clinical research support was supplemented by the following grants or Cooperative Agreements: UL1 RR 024986, UL1 TR 000433, *U54 HD087011*, UL1TR000003, and P30HD040677. The National Emergency Medical Services for Children (EMSC) Data Analysis Resource Center Demonstration grant U07MC09174 provided for educational study materials.

## **SUPPLEMENTARY METHODS**

### **Inclusion and Exclusion Criteria**

#### **Inclusion Criteria (must all be yes)**

1. Did the subject suffer a cardiac arrest requiring chest compressions for at least two minutes (120 seconds) with return of spontaneous circulation/return of circulation (ROSC/ROC) for at least 20 minutes?
2. Is the subject greater than 48 hours (with a corrected gestational age of at least 38 weeks) and less than 18 years of age?
3. Does the subject require continuous mechanical ventilation?

#### **Exclusion Criteria (must all be no)**

1. Is the parent or legal guardian unable to speak English or Spanish?
2. Is randomization impossible within 6 hours of ROSC/ROC?
3. Does the patient have a Glasgow Coma Scale motor response of 5 or 6 prior to randomization?
4. Did the subject receive continuous infusion of epinephrine or norepinephrine at very high doses ( $\geq 2 \mu\text{g}/\text{kg}/\text{minute}$ ) immediately prior to randomization?
5. Does the subject have a history of a prior cardiac arrest with chest compressions for at least 2 minutes during the current hospitalization but outside the 6 hour window for randomization?
6. Does the subject have a pre-existing terminal illness with life expectancy  $< 12$  months?
7. Is there a lack of commitment to aggressive intensive care therapies including “do not resuscitate” orders or other limitations to care?
8. Was the cardiac arrest associated with severe brain, thoracic, or abdominal trauma?
9. Was there active and refractory severe bleeding prior to randomization?
10. Did the subject experience near drowning in ice water with a core temperature  $\leq 32 \text{ }^\circ\text{C}$  on presentation?

11. Is the subject pregnant?
12. Is the patient participating in a concurrent interventional trial whose protocol, in the judgment of the THAPCA investigators, prevents effective application of one or both THAPCA therapeutic treatment arms, or otherwise significantly interferes with carrying out the THAPCA protocol?
13. Is the subject a newborn (< 48 hours of age) with a history of acute birth asphyxia?
14. Was the subject cared for in a neonatal intensive care unit (NICU) after arrest (i.e., would not be admitted to PICU)?
15. Is the subject known to have sickle cell anemia?
16. Is the subject known to have pre-existing cryoglobulinemia?
17. Does the subject have a central nervous system tumor with ongoing chemotherapy or radiation therapy?
18. Does the subject have chronic hypothermia secondary to hypovolemic, pituitary, or related condition for which body temperature is consistently below 37°C?
19. Does the subject have progressive degenerative encephalopathy?
20. Does the subject have any condition in which direct skin surface cooling would be contraindicated, such as large burns, decubitus ulcers, cellulitis, or other conditions with disrupted skin integrity? (NOTE: subjects with open chest CPR should be included but placement of cooling mattresses will be modified as needed).
21. Has the subject been previously enrolled in the THAPCA Trials?

## **Site Training**

A three day study training meeting was conducted prior to the start of the THAPCA Trials. This meeting was repeated annually as a mandatory three day retraining during the conduct of the trial. Additionally, the site neuropsychologists and neurologists received webinar training about the onsite evaluation procedures prior to the first examinations at each site or when there was a change in the site neuropsychologist or neurologist. Training was provided between meetings by one-on-one education sessions with the DCC, webinars and through the use of an online learning management system.

## **Outcome Training**

### **Baseline Assessment**

Caregivers were asked to complete the Parent/Caregiver Rating Form of the VABS-II which is a caregiver questionnaire. Caregivers were asked to base responses on the child's functioning prior to arrest. A site clinical research coordinator or other study staff sat with the family and obtained this information as soon as possible after randomization. If the family was unable to complete the VABS-II within the first 12 hours of admission, the study team tried to obtain the VABS-II every 6 hours until it was completed. Every effort was made to ensure that the VABS-II was completed within 12 hours of randomization. In addition, caregivers provided demographic information, ratings of family functioning, indicators of severity of functioning prior to arrest (e.g., does the child have a tracheostomy tube, ventilator, and/or feeding tube), rating of the child's global functioning, and perceived family burden. At the baseline assessment, information about pre-existing medical conditions and developmental disability was collected and the PCPC/POPC were rated by the study staff based on medical record review.



### Early Follow Up

PCPC/POPC ratings were also obtained by the study staff at each site at PICU and hospital discharge.

### Three and Twelve Month Follow Up

All 3 and 12 month telephone interviews were conducted centrally by staff at the Kennedy Krieger Institute to assure uniform performance of administration of the semi-structured interview used to collect ratings on the VABS-II. Attempts were made to conduct interviews within one month of the designated follow up time (3 months  $\pm$  2 weeks or 12 months  $\pm$  2 weeks). Two to four weeks prior to the telephone interview, site CRCs contacted families to obtain the status of the child and verify current contact information.

In order to assess inter-rater reliability of the VABS-II telephone interviews, a subset of interviews (every 10<sup>th</sup> interview) was recorded. Recorded interviews were reviewed and rescored by B.S. (neuropsychologist). Discrepant scores were adjudicated through discussion between B.S. and the interviewer. Overall inter-rater reliability was high (> 80% agreement).

During the three and twelve month telephone interview in addition to completing the VABS-II, information about the patient's global functioning, perceived family burden, the patient's medical conditions, as well as school performance (for children 5 years and older) was also obtained. PCPC/POPC ratings were obtained through consensus by J.C. and B.S. (rehabilitation physician and neuropsychologist) based on caregiver responses during the interview.

### Twelve Month Onsite Evaluation

After the 12 month VABS-II was completed, onsite neuropsychological and neurological evaluations were completed. All survivors were eligible to participate in the neurological

evaluation and all children less than 5 years, 9 months were eligible for participation in the neuropsychological evaluation. Due to limitations in the age range of the tests, children who were 5 years, 9 months through 5 years, 11 months at the time of follow up were tested after their 6<sup>th</sup> birthday. Children 6 years of age and older who did not have a consistent means of functional communication (based on caregiver responses during the 12 month VABS-II) were not scheduled to participate in the neuropsychological evaluation and were assigned the lowest possible score for purposes of rank order analyses.

As part of the neuropsychological evaluation, a global cognitive score was obtained. For children less than 5 years, 9 months, this score was based on performance on the Mullen Scales of Early Learning (18). In children 6 years of age or older, who were deemed eligible for neuropsychological testing based on the results of the VABS-II, the two subtest version of the Wechsler Abbreviated Scale of Intelligence (19) was used to assess global cognitive functioning.

### **Data Management and Site Monitoring**

Data were recorded on worksheets and entered into a secure Internet-based electronic data capture system (OpenClinica, OpenClinica Inc.) maintained at the DCC (University of Utah, Salt Lake, Utah). Initial VABS-II assessments were faxed to the DCC and centrally scored. Site monitors visited all enrolling sites to assess protocol adherence, regulatory compliance, and verify sources of selected data elements. This was supplemented by remote monitoring for which sites submitted documentation on selected data elements to the DCC and ongoing automated queries sent to sites for discrepant data.

## **SUPPLEMENTARY RESULTS**

### **Temperature Intervention.**

All temperature recordings up to 120 hours were independently reviewed by two individuals (FM and JMD); 89% of therapeutic hypothermia cases and 95% of therapeutic normothermia cases were assessed as Good or Adequate; the remainder were assessed as Poor or Incomplete/Not Evaluable recordings. Median with interquartile range (IQR) times from intervention initiation to reach goal temperature ranges of  $33.0 \pm 1.0^{\circ}\text{C}$  or  $36.75 \pm 0.75^{\circ}\text{C}$  for at least 1 hour, which defined the end of the induction phases and beginning of the maintenance phase of the temperature intervention, were 2.1 (IQR 1.5, 3.5) hours for hypothermia and 2.0 (IQR 1.1, 3.1) hours for normothermia. The time to the goal temperature range was 1 hour less or 1.1 and 1.0 hours, respectively. The median time from ROC until reaching the goal temperature range was 6.4 hours for hypothermia and 5.7 hours for normothermia groups. For hypothermia cases, the total duration of temperature in the  $33.0 \pm 1.0^{\circ}\text{C}$  range was 48.0 (IQR 48.0, 48.0) hours, duration of rewarming 17.5 (IQR 15.1, 18.5) hours and normothermia after rewarming was 52.0 hours (IQR 50.0, 54.5). For normothermia cases, the duration was 120 hours (IQR 120.0, 120.0).

### **Modified Intention-to-treat**

While a modified intention-to-treat based on pre arrest VABS-II  $\geq 70$  score was the primary analysis approach, alternative approaches (modified ITT removing patients not receiving assigned treatment, randomized over 6 hours post ROSC/ROC, and/or otherwise technically not meeting protocol criteria) did not markedly affect significance of study findings or estimated treatment effect. For example, among the 252 evaluable patients receiving their assigned treatment, the p-value for significance of treatment effect was 0.46, and the relative risk for a favorable one-year primary outcome for patients treated with hypothermia versus normothermia was 0.89 with 95% CI (0.64, 1.22). Among the 245 evaluable patients randomized within 6

hours of ROSC/ROD and receiving their assigned treatment, the p-value for significance of treatment effect was 0.45, and the relative risk for a favorable one-year primary outcome for patients treated with hypothermia versus normothermia was 0.88 with 95% CI (0.64, 1.22).

### **Sensitivity Analysis**

Sensitivity analyses were conducted to examine the potential effect of missing primary outcome data on the analysis results. Twelve patients eligible for the primary analysis (two assigned to therapeutic hypothermia and ten to therapeutic normothermia) had missing outcomes. When all possible realizations of missing outcomes were imputed, no scenarios yielding significant p-values for treatment effect in the primary analysis occurred. Point estimates of the relative risk for a favorable one-year outcome for patients treated with hypothermia versus normothermia ranged from 1.03 under the imputed scenario most favorable to hypothermia (i.e., assuming that both hypothermia-arm patients with missing data had a favorable one-year outcome, and that all ten patients in the normothermia arm with missing data had unfavorable one-year outcome) to 0.82 under the imputed scenario most favorable to normothermia.

## SUPPLEMENTARY FIGURES AND TABLES

**Figure S1. Temperature of Patients during 120 Hours of Targeted Temperature Management, According to Treatment Group.**

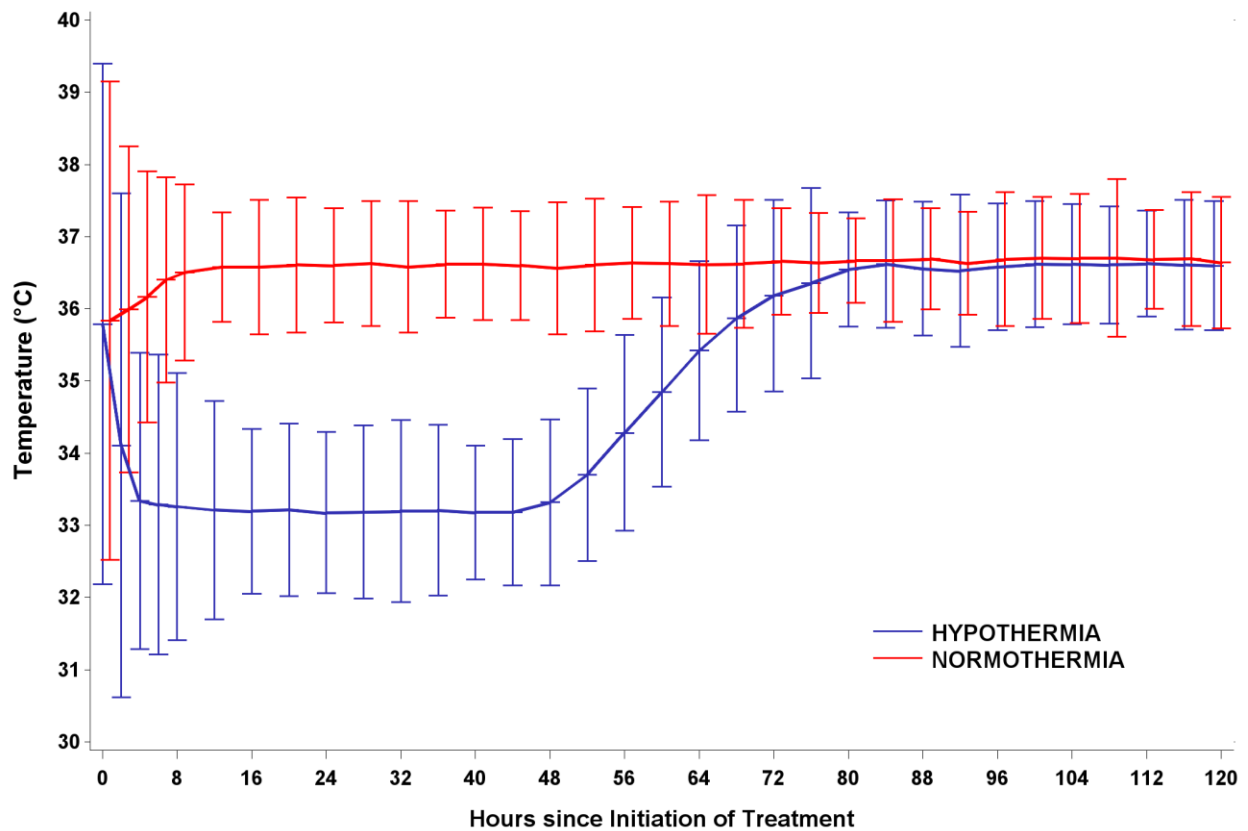

The temperature curves show the means of all primary temperature readings within each time interval (for example, all primary temperature readings from 22 to 26 hours after the initiation of treatment are counted in the category “24 hours since initiation of treatment”). The mean temperatures shown at the horizontal axis time point of 0 hours since initiation of treatment include only temperatures recorded at the time of initiation of treatment. During the first 8 hours after initiation of treatment, 2-hour time intervals are used, with 4-hour time intervals used for the 12 hour time point and beyond. The I bars indicate  $\pm 2$  SD from the mean temperature within each time interval. Time points for normothermia are slightly shifted to prevent overlap. Temperatures recorded after early termination of treatment are not included in this analysis.

**Table S1. Medical History and Primary Cause of the Cardiac Arrest.\***

| Characteristic                                                     | Hypothermia Group<br>(N = 166) | Normothermia Group<br>(N = 163) |
|--------------------------------------------------------------------|--------------------------------|---------------------------------|
| <b>Medical history – no. (%)</b>                                   |                                |                                 |
| No pre-existing medical condition                                  | 13 (8)                         | 17 (10)                         |
| Pre-existing non-cardiac medical condition                         |                                |                                 |
| Lung or airway disease                                             | 54 (33)                        | 55 (34)                         |
| Neurologic condition                                               | 57 (34)                        | 48 (29)                         |
| Gastrointestinal disorder                                          | 50 (30)                        | 50 (31)                         |
| Prenatal condition                                                 | 44 (27)                        | 42 (26)                         |
| Immunocompromised condition or taking immunosuppressive medication | 20 (12)                        | 26 (16)                         |
| Renal condition                                                    | 18 (11)                        | 26 (16)                         |
| Failure to thrive                                                  | 16 (10)                        | 18 (11)                         |
| Endocrine condition                                                | 11 (7)                         | 10 (6)                          |
| Transplant                                                         | 8 (5)                          | 12 (7)                          |
| Other                                                              | 42 (25)                        | 27 (17)                         |
| Pre-existing cardiac medical condition                             |                                |                                 |
| Acquired heart disease                                             | 28 (17)                        | 25 (15)                         |
| Arrhythmia                                                         | 38 (23)                        | 30 (18)                         |
| Congenital acyanotic heart disease                                 | 77 (46)                        | 68 (42)                         |
| Congenital cyanotic heart disease                                  | 20 (12)                        | 23 (14)                         |
| Pre-existing pulmonary hypertension                                |                                |                                 |
| Associated with congenital heart disease                           | 7 (4)                          | 7 (4)                           |
| Not associated with congenital heart disease                       | 3 (2)                          | 3 (2)                           |
| <b>Primary cause of the cardiac arrest – no. (%)</b>               |                                |                                 |
| Cardiovascular event                                               | 89 (54)                        | 74 (45)                         |
| Respiratory event                                                  | 45 (27)                        | 55 (34)                         |
| Congenital heart disease                                           | 24 (14)                        | 27 (17)                         |
| Neurological event                                                 | 3 (2)                          | 1 (1)                           |
| Multiple organ system failure                                      | 0 (0)                          | 2 (1)                           |
| Drug overdose                                                      | 2 (1)                          | 0 (0)                           |
| Electrolyte imbalance                                              | 0 (0)                          | 1 (1)                           |
| Unknown                                                            | 3 (2)                          | 3 (2)                           |

\* P>0.05 for all comparisons between the two groups.

**Table S2. Location within Hospital at Time of Cardiac Arrest.**

|                                                       | <b>Hypothermia</b> | <b>Normothermia</b> | <b>Overall</b> |
|-------------------------------------------------------|--------------------|---------------------|----------------|
|                                                       | <b>N = 166</b>     | <b>N = 163</b>      | <b>N = 329</b> |
| Intensive care unit (includes intermediate care)      | 96 (58%)           | 106 (65%)           | 202 (61%)      |
| Emergency department                                  | 26 (16%)           | 17 (10%)            | 43 (13%)       |
| Inpatient ward                                        | 20 (12%)           | 14 (9%)             | 34 (10%)       |
| Operating room                                        | 14 (8%)            | 13 (8%)             | 27 (8%)        |
| Other clinical location (radiology, laboratory, etc.) | 9 (5%)             | 11 (7%)             | 20 (6%)        |
| Non-clinical location (cafeteria, waiting room, etc.) | 1 (1%)             | 2 (1%)              | 3 (1%)         |



**Table S3.** Clinical Characteristics Prior to Intervention for Study Population.

| <b>Clinical characteristics prior to intervention – median (IQR)</b> | <b>HYPOTHERMIA (N=166)</b> | <b>NORMOTHERMIA (N=163)</b> |
|----------------------------------------------------------------------|----------------------------|-----------------------------|
| First measured body temperature (°C) (n=321)                         | 35.7 (34.4, 37.0)          | 36.0 (34.7, 37.0)           |
| pH (n=290)                                                           | 7.36 (7.27, 7.44)          | 7.32 (7.24, 7.42)           |
| PaCO <sub>2</sub> (mmHg) (n=290)                                     | 38.5 (31.5, 47.0)          | 40.5 (34.0, 47.0)           |
| PaO <sub>2</sub> (mmHg) (n=289)                                      | 132.5 (67.5, 287.5)        | 161.0 (72.0, 284.0)         |
| Saturation (%) (n=279)                                               | 98.0 (91.0, 100.0)         | 99.0 (92.0, 100.0)          |
| HCO <sub>3</sub> /Bicarbonate (mmol/L) (n=290)                       | 22.0 (17.0, 27.0)          | 22.0 (18.0, 26.0)           |
| Lactate (mmol/liter) (n=289)                                         | 5.7 (2.5, 11.9)            | 7.2 (3.5, 12.2)             |
| Sodium (mmol/L) (n=314)                                              | 144 (140, 149)             | 144 (140, 149)              |
| Potassium (mmol/L) (n=313)                                           | 3.9 (3.2, 4.6)             | 3.8 (3.2, 4.5)              |
| Bicarbonate (mmol/L) (n=285)                                         | 21.0 (16.0, 27.0)          | 21.0 (17.0, 24.0)           |
| Chloride (mmol/L) (n=292)                                            | 105 (100, 109)             | 105 (100, 109)              |
| BUN (mg/dL) (n=291)                                                  | 15.0 (9.0, 22.5)           | 15.0 (10.0, 24.0)           |
| Creatinine (mg/dL) (n=291)                                           | 0.6 (0.4, 1.0)             | 0.6 (0.4, 1.0)              |
| Glucose (mg/dL) (n=299)                                              | 178 (116, 269)             | 188 (119, 281)              |
| Magnesium (mg/dL) (n=258)                                            | 2.1 (1.8, 2.6)             | 2.1 (1.8, 2.4)              |
| Ionized calcium (mmol/L) (n=283)                                     | 1.2 (1.1, 1.4)             | 1.2 (1.1, 1.3)              |
| Total calcium (mg/dL) (n=257)                                        | 9.2 (8.2, 10.2)            | 8.9 (8.1, 10.2)             |
| Phosphate (mg/dL) (n=218)                                            | 5.8 (4.3, 8.7)             | 6.2 (4.9, 8.3)              |
| ALT/SGPT (U/L) (n=270) *                                             | 61 (29, 200)               | 39 (22, 111)                |
| AST/SGOT (U/L) (n=258) *                                             | 148 (49, 355)              | 81 (47, 203)                |
| Total bilirubin (mg/dL) (n=260)                                      | 0.7 (0.4, 1.3)             | 0.8 (0.4, 1.4)              |
| PT (seconds) (n=267)                                                 | 19.4 (16.3, 26.8)          | 19.5 (15.8, 26.0)           |
| PTT (seconds) (n=272)                                                | 68.0 (37.0, 150.0)         | 99.6 (39.5, 165.0)          |
| INR (n=272)                                                          | 1.7 (1.4, 2.3)             | 1.8 (1.4, 2.4)              |
| Amylase (U/L) (n=156)                                                | 30.0 (16.0, 67.0)          | 30.0 (13.0, 44.0)           |
| Lipase (U/L) (n=148)                                                 | 51.5 (21.0, 106.0)         | 44.0 (21.0, 81.5)           |
| Hemoglobin (g/dL) (n=304) *                                          | 12.3 (10.6, 13.7)          | 11.6 (10.0, 13.4)           |
| Platelet count (10 <sup>3</sup> /microL) (n=303)                     | 142 (94, 251)              | 124 (65, 252)               |
| White blood cell (10 <sup>3</sup> /microL) (n=301)                   | 11.7 (7.1, 17.6)           | 9.6 (6.0, 16.6)             |

\* P&lt;0.05 for comparison.

**Table S4. Baseline VABS-II, PCPC, and POPC for THAPCA-IH population eligible for primary outcome.**

|                                                       | Hypothermia<br>N = 135 | Normothermia<br>N = 134 | Overall<br>N = 269 |
|-------------------------------------------------------|------------------------|-------------------------|--------------------|
| <b>Vineland Adaptive Behavior Scales-II (VABS-II)</b> |                        |                         |                    |
| N (completed and scorable)                            | 131                    | 127                     | 258                |
| Min                                                   | 70                     | 70                      | 70                 |
| Max                                                   | 143                    | 156                     | 156                |
| Mean                                                  | 96.3                   | 95.1                    | 95.7               |
| SD                                                    | 15.3                   | 16.2                    | 15.7               |
| Median                                                | 94                     | 93                      | 94                 |
| <b>Pediatric Cerebral Performance Category (PCPC)</b> |                        |                         |                    |
| Normal = 1                                            | 83 (61%)               | 87 (65%)                | 170 (63%)          |
| Mild disability = 2                                   | 38 (28%)               | 33 (25%)                | 71 (26%)           |
| Moderate disability = 3                               | 12 (9%)                | 8 (6%)                  | 20 (7%)            |
| Severe disability = 4                                 | 2 (1%)                 | 5 (4%)                  | 7 (3%)             |
| Coma or vegetative state = 5                          | 0 (0%)                 | 1 (1%)                  | 1 (0%)             |
| <b>Pediatric Overall Performance Category (POPC)</b>  |                        |                         |                    |
| Good = 1                                              | 50 (37%)               | 52 (39%)                | 102 (38%)          |
| Mild disability = 2                                   | 54 (40%)               | 51 (38%)                | 105 (39%)          |
| Moderate disability = 3                               | 24 (18%)               | 22 (16%)                | 46 (17%)           |
| Severe disability = 4                                 | 7 (5%)                 | 8 (6%)                  | 15 (6%)            |
| Coma or vegetative state = 5                          | 0 (0%)                 | 1 (1%)                  | 1 (0%)             |

Note: 31 patients in the hypothermia arm and 29 patients in the normothermia arm had baseline VABS-II less than 70 or had no baseline VABS-II available and POPC or PCPC  $\geq$  3, and were excluded from the primary analysis.

**Table S5. Cause of Death.**

|                                                                    | <b>Hypothermia<br/>N = 85</b> | <b>Normothermia<br/>N = 88</b> |
|--------------------------------------------------------------------|-------------------------------|--------------------------------|
| Cardiovascular failure / futility                                  | 26 (31%)                      | 33 (38%)                       |
| Withdrawal for poor neurologic prognosis /<br>brain death declared | 33 (39%)                      | 29 (33%)                       |
| Withdrawal for other system failure                                | 12 (14%)                      | 10 (11%)                       |
| Respiratory failure / futility                                     | 3 (4%)                        | 7 (8%)                         |
| Other                                                              | 9 (11%)                       | 9 (10%)                        |
| Unknown                                                            | 2 (2%)                        | 0 (0%)                         |

**Table S6. 12 month functioning on the Mullen Scales of Early Learning (Mullen) and 2-subtest version of the Wechsler Abbreviated Scale of Intelligence (WASI)<sup>1</sup>**

|                                                                                 | Hypothermia | Normothermia | P-value           |
|---------------------------------------------------------------------------------|-------------|--------------|-------------------|
| <b>Mullen Early Learning Composite (age &lt; 5 years 9 months) – no. (%)</b>    | n=53        | n=35         | 0.13 <sup>4</sup> |
| Lowest possible score                                                           | 16 (30)     | 5 (14)       |                   |
| 49 – 69 (well below average)                                                    | 17 (32)     | 10 (29)      |                   |
| 70 – 84 (below average)                                                         | 7 (13)      | 11 (31)      |                   |
| 85 – 115 (average)                                                              | 12 (23)     | 7 (20)       |                   |
| > 115 (above average)                                                           | 1 (2)       | 2 (6)        |                   |
| <b>WASI IQ (age ≥ 6 years) – no. (%)<sup>2</sup></b>                            | n=15        | n=13         | 0.27 <sup>5</sup> |
| Lowest possible score <sup>3</sup>                                              | 2 (13)      | 3 (23)       |                   |
| 55 – 69 (well below average)                                                    | 1 (7)       | 1 (8)        |                   |
| 70 – 84 (below average)                                                         | 2 (13)      | 3 (23)       |                   |
| 85 – 115 (average)                                                              | 9 (60)      | 6 (46)       |                   |
| > 115 (above average)                                                           | 1 (7)       | 0 (0)        |                   |
| <b>Mullen Early Learning Composite or WASI IQ (all ages combined) – no. (%)</b> | n=68        | n=48         | 0.46 <sup>6</sup> |
| Lowest possible score                                                           | 18 (26)     | 8 (17)       |                   |
| < 70 (well below average)                                                       | 18 (26)     | 11 (23)      |                   |
| 70 – 84 (below average)                                                         | 9 (13)      | 14 (29)      |                   |
| 85 – 115 (average)                                                              | 21 (31)     | 13 (27)      |                   |
| > 115 (above average)                                                           | 2 (3)       | 2 (4)        |                   |

<sup>1</sup> Only children alive at one year are represented in table. Thirty-nine children, 13 in the Hypothermia group and 26 in the Normothermia group, were known to be alive at one year but are not represented because of missing neuropsychological data.

<sup>2</sup> One participant was administered the Vocabulary and Matrix Reasoning subtests from the Wechsler Intelligence Scale for Children - Fourth Edition in place of the comparable WASI subtests.

<sup>3</sup> Children age 6 and over with lowest possible score were reported to have no consistent means of functional communication on the 12 month VABS-II assessment interview. These children did not participate in the onsite neuropsychological evaluation and were assigned the lowest possible score.

<sup>4</sup> P-value reflects the Mann-Whitney test based on the continuous Mullen Early Learning Composite score. Patients with a score < 49 are assigned a rank of -1000 (i.e., the lowest possible score).

<sup>5</sup> P-value reflects the Mann-Whitney test based on the continuous WASI IQ score. Patients considered ineligible for the evaluation due to the severity of their injury are assigned a rank of -1000 (i.e., the lowest possible score).

<sup>6</sup> P-value reflects the Mann-Whitney test based on the continuous Mullen Early Learning Composite or WASI IQ score.

**Table S7. Adverse Events Reported During Intervention Period (120 hours) by Treatment Received.**

|                                                             | <b>Hypothermia<br/>N = 161</b> | <b>Normothermia<br/>N = 160</b> | <b>P-value<sup>1</sup></b> |
|-------------------------------------------------------------|--------------------------------|---------------------------------|----------------------------|
| Hypokalemia <sup>2</sup>                                    | 42/161 (26%)                   | 31/160 (19%)                    | 0.15                       |
| Hyperkalemia <sup>2</sup>                                   | 2/161 (1%)                     | 7/160 (4%)                      | 0.10                       |
| Hypoglycemia <sup>2</sup>                                   | 7/161 (4%)                     | 3/160 (2%)                      | 0.22                       |
| Hyperglycemia <sup>2</sup>                                  | 20/161 (12%)                   | 18/160 (11%)                    | 0.75                       |
| Hypophosphatemia <sup>2</sup>                               | 10/161 (6%)                    | 6/160 (4%)                      | 0.33                       |
| Neutropenia <sup>2</sup>                                    | 1/161 (1%)                     | 1/160 (1%)                      | 1.00                       |
| Thrombocytopenia <sup>2</sup>                               | 12/161 (7%)                    | 10/160 (6%)                     | 0.68                       |
| Clinical or Electrographic Seizure <sup>3</sup>             | 34/161 (21%)                   | 30/160 (19%)                    | 0.60                       |
| Repeat Cardiac Arrest <sup>3</sup>                          | 19/161 (12%)                   | 25/160 (16%)                    | 0.33                       |
| Received any form of Renal Replacement Therapy <sup>3</sup> | 40/161 (25%)                   | 37/160 (23%)                    | 0.72                       |

<sup>1</sup> P-values for all comparisons are 2-sided mid p-values, based on an exact likelihood ratio test.

<sup>2</sup> Medical Dictionary for Regulatory Activities (MedDRA) lower level term of adverse events reported in adverse events log.

<sup>3</sup> Patient experienced event or therapy as reported on daily data collection forms.

**Table S8. Summary of Serious Adverse Events by Medical Dictionary for Regulatory Activities (MedDRA) System Organ Class by Treatment Received<sup>1</sup>**

| MedDRA System Organ Class                            | Hypothermia       |                 | Normothermia      |                 |
|------------------------------------------------------|-------------------|-----------------|-------------------|-----------------|
|                                                      | Patients<br>N=161 | Events<br>N=128 | Patients<br>N=160 | Events<br>N=128 |
| Blood and lymphatic system disorders                 | 4 (2%)            | 4               | 1 (1%)            | 1               |
| Cardiac disorders                                    | 30 (19%)          | 37              | 34 (21%)          | 38              |
| Gastrointestinal disorders                           | 2 (1%)            | 2               | 3 (2%)            | 3               |
| General disorders and administration site conditions | 8 (5%)            | 9               | 7 (4%)            | 7               |
| Infections and infestations                          | 9 (6%)            | 9               | 11 (7%)           | 12              |
| Injury, poisoning and procedural complications       | 4 (2%)            | 4               | 6 (4%)            | 6               |
| Investigations                                       | 3 (2%)            | 3               | 4 (3%)            | 4               |
| Metabolism and nutrition disorders                   | 1 (1%)            | 1               | 1 (1%)            | 1               |
| Musculoskeletal and connective tissue disorders      | 1 (1%)            | 1               | 2 (1%)            | 2               |
| Nervous system disorders                             | 32 (20%)          | 33              | 29 (18%)          | 30              |
| Renal and urinary disorders                          | 1 (1%)            | 1               | 6 (4%)            | 6               |
| Respiratory, thoracic and mediastinal disorders      | 13 (8%)           | 13              | 9 (6%)            | 11              |
| Vascular disorders                                   | 11 (7%)           | 11              | 7 (4%)            | 7               |

\* P>0.05 for all comparisons between the two groups.

<sup>1</sup> MedDRA® the Medical Dictionary for Regulatory Activities terminology is the international medical terminology developed under the auspices of the International Conference on Harmonisation of Technical Requirements for Registration of Pharmaceuticals for Human Use (ICH). MedDRA: MedDRA® trademark is owned by IFPMA on behalf of ICH.

**Table S9. Primary Outcome by Subgroup Populations.**

|                                                                  | % Alive and VABS $\geq$ 70 |                         | P value <sup>2</sup> |
|------------------------------------------------------------------|----------------------------|-------------------------|----------------------|
|                                                                  | Hypothermia<br>N = 133     | Normothermia<br>N = 124 |                      |
| <b>Age Group at Randomization</b>                                |                            |                         |                      |
| <2 years                                                         | 31/82 (38%)                | 31/79 (39%)             | 0.81                 |
| 2-11 years                                                       | 13/37 (35%)                | 12/28 (43%)             | 0.53                 |
| $\geq$ 12 years                                                  | 4/14 (29%)                 | 5/17 (29%)              | 0.85                 |
| <b>Sex</b>                                                       |                            |                         |                      |
| Male                                                             | 25/79 (32%)                | 26/73 (36%)             | 0.55                 |
| Female                                                           | 23/54 (43%)                | 22/51 (43%)             | 0.77                 |
| <b>Ethnicity</b>                                                 |                            |                         |                      |
| Hispanic or Latino                                               | 10/30 (33%)                | 8/21 (38%)              | 0.88                 |
| Not Hispanic or Latino                                           | 37/97 (38%)                | 38/96 (40%)             | 0.83                 |
| Stated as Unknown                                                | 1/6 (17%)                  | 2/7 (29%)               |                      |
| <b>Race</b>                                                      |                            |                         |                      |
| Asian                                                            | 3/4 (75%)                  | 1/3 (33%)               | 0.78                 |
| Black or African American                                        | 14/43 (33%)                | 12/30 (40%)             | 0.39                 |
| White                                                            | 28/77 (36%)                | 25/75 (33%)             | 0.67                 |
| Other                                                            | 0/4 (0%)                   | 5/7 (71%)               | 0.11                 |
| Unknown                                                          | 3/5 (60%)                  | 5/9 (56%)               |                      |
| <b>Patient had congenital heart disease</b>                      |                            |                         |                      |
| Yes                                                              | 27/79 (34%)                | 29/70 (41%)             | 0.35                 |
| No                                                               | 21/54 (39%)                | 19/54 (35%)             | 0.77                 |
| <b>Patient was post-operative cardiac surgery</b>                |                            |                         |                      |
| Yes                                                              | 16/41 (39%)                | 19/50 (38%)             | 0.91                 |
| No                                                               | 32/92 (35%)                | 29/74 (39%)             | 0.57                 |
| <b>ECMO used after cardiac arrest and prior to randomization</b> |                            |                         |                      |
| Yes                                                              | 20/77 (26%)                | 27/82 (33%)             | 0.34                 |
| No                                                               | 28/56 (50%)                | 21/42 (50%)             | 0.92                 |
| <b>ECMO used at time of treatment initiation</b>                 |                            |                         |                      |
| Yes                                                              | 19/75 (25%)                | 26/82 (32%)             | 0.34                 |
| No                                                               | 29/58 (50%)                | 22/42 (52%)             | 0.76                 |

<sup>1</sup> Denominators reported reflect those with known outcome status.

<sup>2</sup> P-values are mid p-values from an exact score test for treatment effect within subgroup in a logistic model controlling for age category (except for within age group comparisons).



**Table S10. Primary Outcome by Subgroups of Descriptive Exploratory Interest<sup>1</sup>**

|                                           | % Alive and VABS ≥ 70  |                         | P value <sup>2</sup> |
|-------------------------------------------|------------------------|-------------------------|----------------------|
|                                           | Hypothermia<br>N = 133 | Normothermia<br>N = 124 |                      |
| <b>All Cases</b>                          | 48/133 (36%)           | 48/124 (39%)            | 0.65                 |
| <b>Initial Arrest Rhythm<sup>3</sup></b>  |                        |                         |                      |
| Asystole                                  | 2/12 (17%)             | 0/5 (0%)                | 0.70                 |
| Bradycardia                               | 24/75 (32%)            | 24/68 (35%)             | 0.53                 |
| Pulseless electrical activity (PEA)       | 13/28 (46%)            | 12/30 (40%)             | 0.68                 |
| Ventricular fibrillation or tachycardia   | 8/14 (57%)             | 12/16 (75%)             | 0.57                 |
| Unknown                                   | 1/4 (25%)              | 0/5 (0%)                | 0.13                 |
| <b>CPR Duration (minutes)<sup>3</sup></b> |                        |                         |                      |
| 2-15                                      | 30/56 (54%)            | 21/47 (45%)             | 0.38                 |
| 15-30                                     | 5/20 (25%)             | 6/17 (35%)              | 0.38                 |
| >30                                       | 13/57 (23%)            | 21/60 (35%)             | 0.13                 |
| <b>Arrest Etiology<sup>3</sup></b>        |                        |                         |                      |
| Cardiac                                   | 24/72 (33%)            | 26/56 (46%)             | 0.13                 |
| Respiratory                               | 16/34 (47%)            | 13/40 (33%)             | 0.54                 |
| Congenital Heart Disease                  | 6/21 (29%)             | 7/22 (32%)              | 0.88                 |
| Other                                     | 2/6 (33%)              | 2/6 (33%)               | 0.72                 |

<sup>1</sup> Denominators reported reflect those with known outcome status.

<sup>2</sup> P-values shown are mid p-values from an exact score test for treatment effect within subgroup in a logistic model controlling for age category.

<sup>3</sup> The exploratory subgroup analyses of rhythm, arrest duration, and arrest etiology represent factors known associated with cardiac arrest outcome.

**Table S11. Blood Product Use within 7 Days after Randomization by Treatment Received excluding ECMO cases.**

| <b>Outcome</b>                        | <b>Hypothermia Group (N = 76)</b> | <b>Normothermia Group (N = 66)</b> | <b>P Value<sup>1</sup></b> |
|---------------------------------------|-----------------------------------|------------------------------------|----------------------------|
| Blood-product use – no. (%)           |                                   |                                    |                            |
| Any                                   | 54 (71)                           | 46 (70)                            | 0.86                       |
| Type                                  |                                   |                                    |                            |
| Cryoprecipitate                       | 11 (14)                           | 14 (21)                            | 0.30                       |
| Fresh-frozen plasma                   | 26 (34)                           | 21 (32)                            | 0.77                       |
| Packed red blood cells or whole blood | 46 (61)                           | 41 (62)                            | 0.85                       |
| Platelets                             | 26 (34)                           | 16 (24)                            | 0.20                       |

<sup>1</sup>P values for all comparisons are two-sided mid-P values, based on an exact likelihood-ratio test.
